# Supplementary figures and images for: PI4P and BLOC-1 remodel endosomal membranes into tubules
Source: PubMed Central journal article supplement — J Cell Biol. 2022 Sep 28;221(11):e202110132. doi: 10.1083/jcb.202110132 (PMC9524204; doi:10.1083/jcb.202110132), 2022-09-28

**Figure 3**

A)

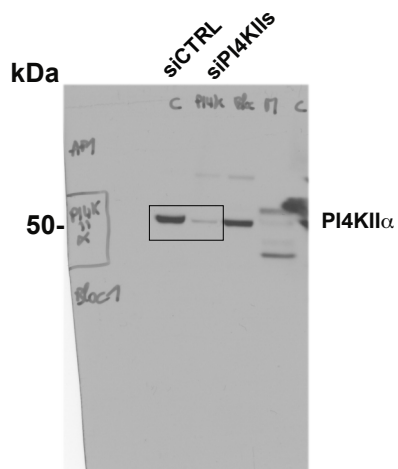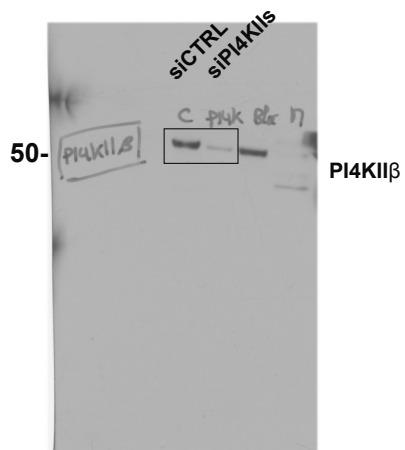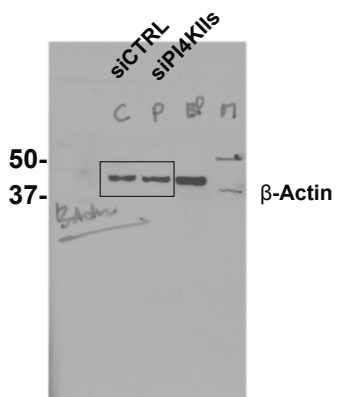

Supplement: JCB_202110132_SourceDataF3.pdf [file JCB_202110132_SourceDataF3.pdf]

Figure S2

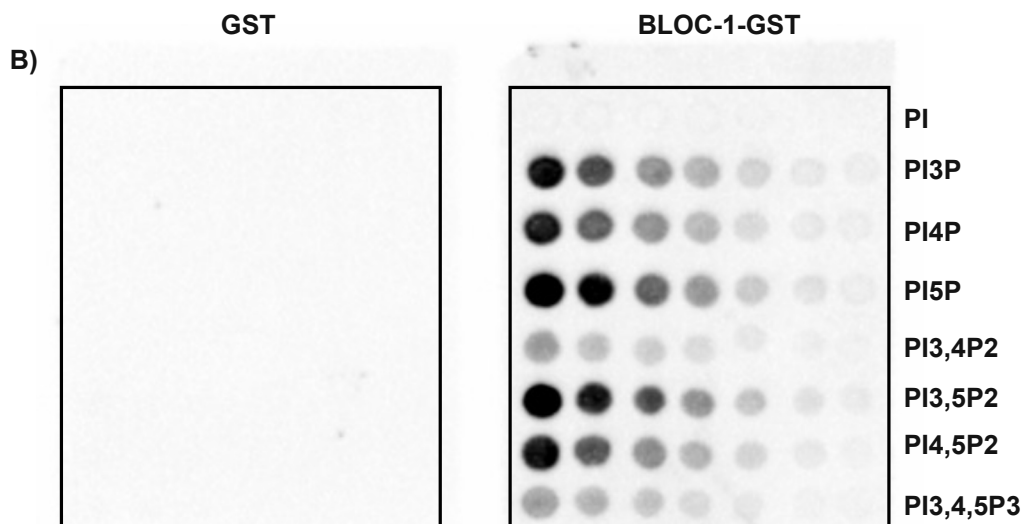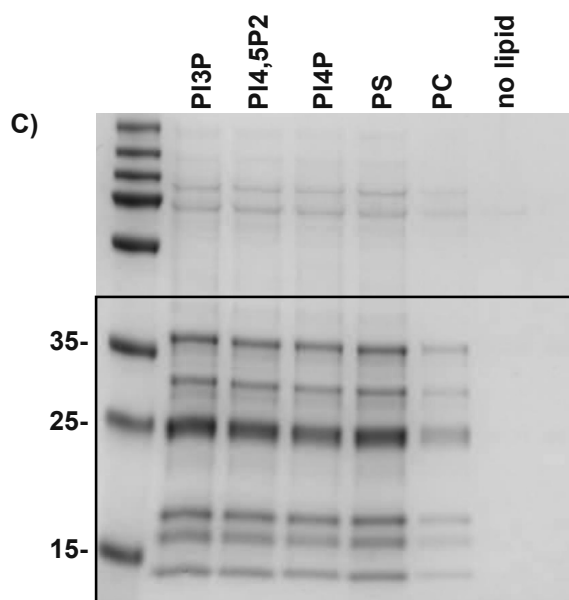

Supplement: JCB_202110132_SourceDataFS2.pdf [file JCB_202110132_SourceDataFS2.pdf]

**Figure S3**

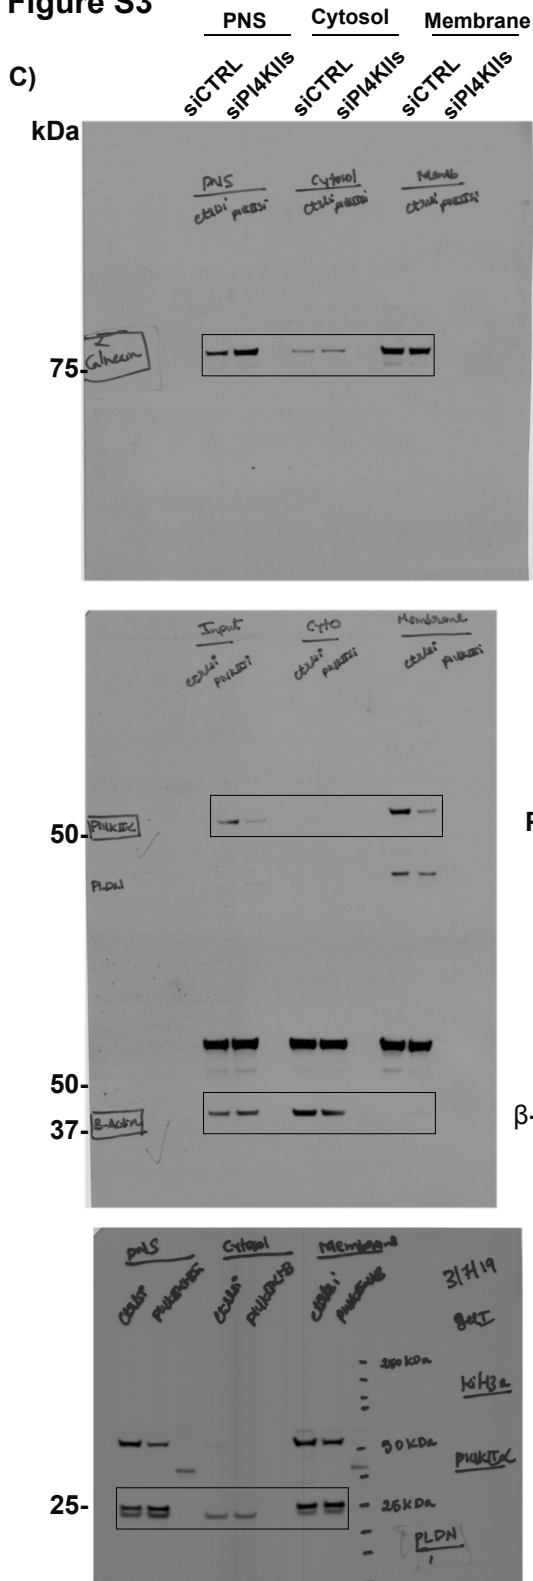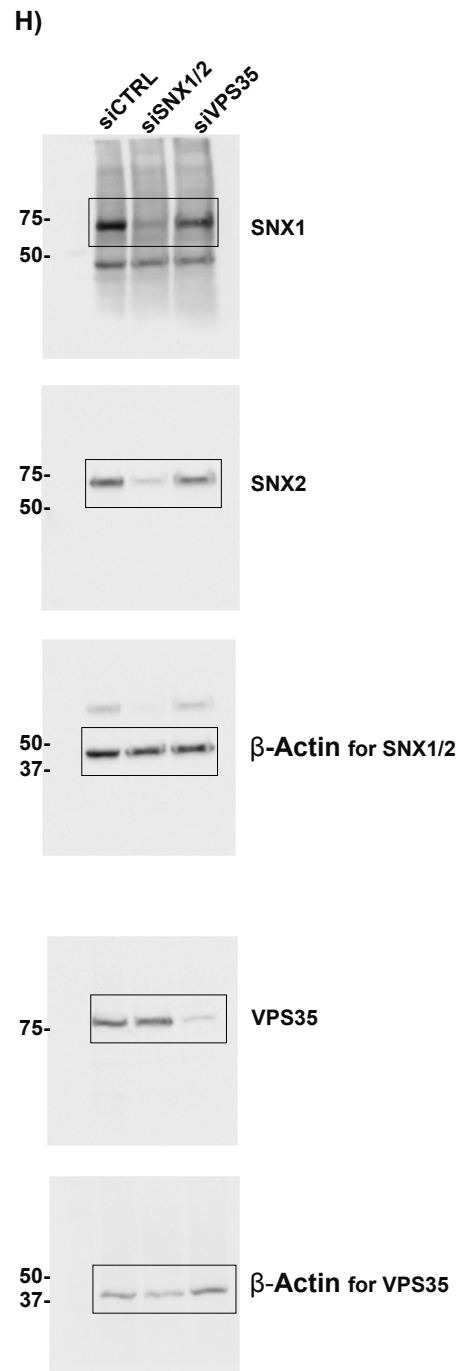

Supplement: JCB_202110132_SourceDataFS3.pdf [file JCB_202110132_SourceDataFS3.pdf]

Figure S6

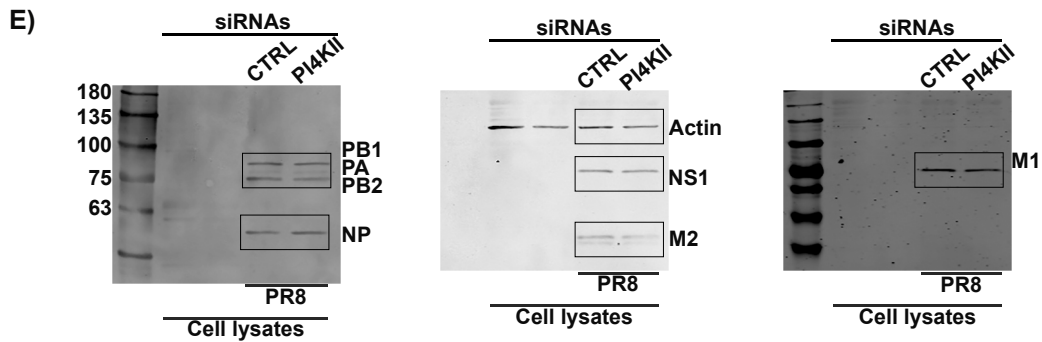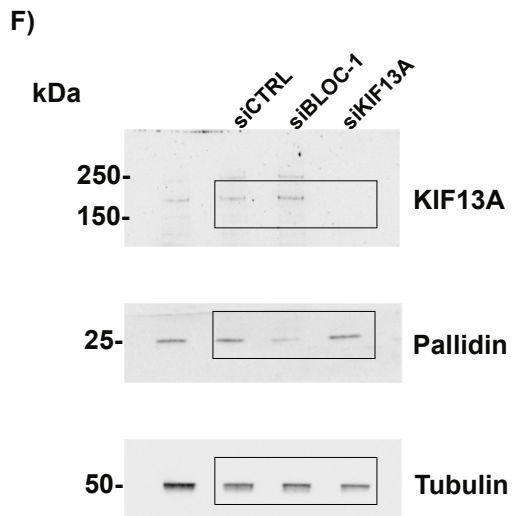

Supplement: JCB_202110132_SourceDataFS6.pdf [file JCB_202110132_SourceDataFS6.pdf]
